# Supplementary material for: SNP heterozygosity, relatedness and inbreeding of whole genomes from the isolated population of the Faroe Islands
Source: PubMed Central journal article supplement (PMC10666429; doi:10.1186/s12864-023-09763-x), 2023-11-23
Supplement: 12864_2023_9763_MOESM1_ESM.pdf [file 12864_2023_9763_MOESM1_ESM.pdf]

# Additional file 1 - Supplementary tables of SNPs, heterozygosity and relatedness

The number of SNPs, the heterozygosity and the relatedness were found from autosome variant files (.vcf) containing both SNPs and Indels that we filtered with BCFTtools to only include SNPs (`bcftools filter -i TYPE='snp'`). We quality-filtered (`bcftools filter -i QUAL>30`) and merged the sample files (`--bcftools merge`). With PLINK software, we converted the quality-filtered SNPs (.vcf) files to PLINK format (.bed) with missing variant ID's replaced with unique ID's. We made quality control reports with KING (`king --bysample`, `king --bySNP`) to investigate the missing rate, the number of SNPs and the heterozygosity, and we studied relatedness with KING (`king --kinship`). The effect of merging on the missing rate,  $N_{SNP}$ ,  $H$  and  $R$  was studied both before and after applying a PLINK filter for genotype missingness and Hardy-Weinberg (H-W) equilibrium threshold (`--geno 0.1 --hwe 1e-7`). For further details see Methods in the main manuscript.

Table S1.1: Filter (`bcftools filter -i`) used to filter the SNP files before further processing with PLINK and KING.

| Autosome files | Filter-text |
|----------------|-------------|
| SNP VCFs       | QUAL>30     |

Table S1.2: The KING quality control report (`--bysample`) for the single samples. Note the low missing rate.

| IID     | N_SNP   | Missing | H      |
|---------|---------|---------|--------|
| SAMPLE1 | 3532173 | 4e-04   | 0.5983 |
| SAMPLE2 | 3561096 | 4e-04   | 0.6015 |
| SAMPLE3 | 3554723 | 4e-04   | 0.6002 |
| SAMPLE4 | 3496840 | 4e-04   | 0.5737 |
| SAMPLE5 | 3566139 | 4e-04   | 0.5969 |
| SAMPLE6 | 3557612 | 4e-04   | 0.6002 |
| SAMPLE7 | 3578669 | 4e-04   | 0.6043 |
| SAMPLE8 | 3568947 | 4e-04   | 0.6043 |

Table S1.3: Summary of  $N_{SNP}$  on autosomes from the KING quality control (`--bysample`) for the eight single samples ( $n = 1$ ).

| n | values | min     | q1      | med     | mean    | q3      | max     | iqr   | sd    |
|---|--------|---------|---------|---------|---------|---------|---------|-------|-------|
| 1 | 8      | 3496840 | 3549086 | 3559354 | 3552025 | 3566841 | 3578669 | 17756 | 26065 |

Table S1.4: Summary of  $H$  on autosomes from the KING quality control (`--bysample`) for the eight single samples ( $n = 1$ ).

| n | values | min    | q1    | med    | mean   | q3     | max    | iqr    | sd     |
|---|--------|--------|-------|--------|--------|--------|--------|--------|--------|
| 1 | 8      | 0.5737 | 0.598 | 0.6002 | 0.5974 | 0.6022 | 0.6043 | 0.0042 | 0.0099 |

Table S1.5: The KING quality control (`--bysample`) for the merged samples. Note the much higher missing rate for the merged samples while both  $N_{SNP}$  and  $H$  are similar to the values for the single samples. This is because the merging of samples marks the SNPs as missing that are not common to all the samples in the merged dataset.

| IID     | N_SNP   | Missing | H      |
|---------|---------|---------|--------|
| SAMPLE1 | 3531455 | 0.5013  | 0.5983 |
| SAMPLE2 | 3559988 | 0.4973  | 0.6014 |
| SAMPLE3 | 3553862 | 0.4981  | 0.6001 |
| SAMPLE4 | 3495666 | 0.5064  | 0.5737 |
| SAMPLE5 | 3564981 | 0.4966  | 0.5969 |
| SAMPLE6 | 3556428 | 0.4978  | 0.6002 |
| SAMPLE7 | 3577394 | 0.4948  | 0.6042 |
| SAMPLE8 | 3567597 | 0.4962  | 0.6042 |

Table S1.6: The KING quality control report (`--bysample`) for the eight merged samples after missing genotype filtering (`--geno 0.1`). Note the large decreases in both  $N_{SNP}$  and  $H$  as compared to Table S1.5. The missing column is 0 since all missing genotypes have been filtered out and  $N_{SNP}$  becomes equal for all the samples.

| IID     | N_SNP   | Missing | H      |
|---------|---------|---------|--------|
| SAMPLE1 | 1136546 | 0       | 0.2861 |
| SAMPLE2 | 1136546 | 0       | 0.2992 |
| SAMPLE3 | 1136546 | 0       | 0.2836 |
| SAMPLE4 | 1136546 | 0       | 0.2812 |
| SAMPLE5 | 1136546 | 0       | 0.2928 |
| SAMPLE6 | 1136546 | 0       | 0.2920 |
| SAMPLE7 | 1136546 | 0       | 0.2968 |
| SAMPLE8 | 1136546 | 0       | 0.2960 |

Table S1.7: Summary of  $N_{SNP}$  on autosomes from the KING quality control (`--bysample`) for the merged samples ( $n = 8$ ) before (first row) and after (second row) missing genotypes filtering. Note the similarity of  $N_{SNP}$  before the filtering with  $N_{SNP}$  for single samples in Table S1.3.

| n | values | min     | q1      | med     | mean    | q3      | max     | iqr   | sd    |
|---|--------|---------|---------|---------|---------|---------|---------|-------|-------|
| 8 | 8      | 3495666 | 3548260 | 3558208 | 3550921 | 3565635 | 3577394 | 17375 | 25994 |
| 8 | 8      | 1136546 | 1136546 | 1136546 | 1136546 | 1136546 | 1136546 | 0     | 0     |

Table S1.8: Summary of the heterozygosity  $H$  on autosomes from the KING quality control (`--bysample`) for the merged samples ( $n = 8$ ) before and after missing genotypes filtering. Note the similarity of  $H$  before the filtering with  $H$  for single samples in Table S1.4

| n | values | min    | q1     | med    | mean   | q3     | max    | iqr    | sd     |
|---|--------|--------|--------|--------|--------|--------|--------|--------|--------|
| 8 | 8      | 0.5737 | 0.5980 | 0.6002 | 0.5974 | 0.6021 | 0.6042 | 0.0042 | 0.0099 |
| 8 | 8      | 0.2812 | 0.2855 | 0.2924 | 0.2910 | 0.2962 | 0.2992 | 0.0107 | 0.0066 |

Table S1.9: Summary of the pairwise relatedness  $R$  on autosomes from the KING (`--kinship`) report for the eight merged samples ( $n = 8$ ) before and after missing genotypes filtering. Here, the number of values is 28 since there are 28 possible pairwise relationships between eight samples.

| n | values | min    | q1     | med    | mean   | q3     | max    | iqr    | sd     |
|---|--------|--------|--------|--------|--------|--------|--------|--------|--------|
| 8 | 28     | 0.6442 | 0.6628 | 0.6694 | 0.6714 | 0.6719 | 0.8222 | 0.0091 | 0.0310 |
| 8 | 28     | 0.5016 | 0.5102 | 0.5148 | 0.5239 | 0.5258 | 0.7312 | 0.0156 | 0.0415 |

Table S1.10: Summary of the  $N_{SNP}$  from the KING (`--kinship`) report used to calculate pairwise relatedness for the eight merged samples before and after missing genotypes filtering. Here,  $N_{SNP}$  is the number of SNPs shared between the two samples of each relationship. It is lower than the  $N_{SNP}$  of both the single samples (Table S1.3) and the merged samples (Table S1.7) before missing genotype filtering. It is the same as the  $N_{SNP}$  for merged samples after missing genotype filtering where all the samples share the same SNPs.

| n | values | min     | q1      | med     | mean    | q3      | max     | iqr   | sd     |
|---|--------|---------|---------|---------|---------|---------|---------|-------|--------|
| 8 | 28     | 2310639 | 2336570 | 2348854 | 2365699 | 2359269 | 2885319 | 22699 | 103284 |
| 8 | 28     | 1136546 | 1136546 | 1136546 | 1136546 | 1136546 | 1136546 | 0     | 0      |

Table S1.11: Summary of the KING quality report (`--bySNP`) for the eight merged samples before missing genotype filtering. The summary is grouped by the number of samples  $N$  with non-missing genotypes. The  $H$  across SNPs is highest for the SNPs only called in one sample and lowest for the SNPs called in all samples.

| N | CallRate | SNPs    | Genotypes | Aa      | H      |
|---|----------|---------|-----------|---------|--------|
| 1 | 0.125    | 1724918 | 1724918   | 1595874 | 0.9252 |
| 2 | 0.250    | 1031330 | 2062660   | 1841243 | 0.8927 |
| 3 | 0.375    | 770323  | 2310969   | 1966315 | 0.8509 |
| 4 | 0.500    | 654173  | 2616692   | 2103921 | 0.8040 |
| 5 | 0.625    | 587430  | 2937150   | 2180339 | 0.7423 |
| 6 | 0.750    | 571066  | 3426396   | 2271963 | 0.6631 |
| 7 | 0.875    | 605174  | 4236218   | 2366225 | 0.5586 |
| 8 | 1.000    | 1136546 | 9092368   | 2645501 | 0.2910 |

Table S1.12: Summary of the KING quality report (`--bySNP`) for the merged samples both before and after missing genotype filtering (`--geno 0.1`). The overall  $H$  is calculated from the number of heterozygous genotypes divided by the total number of genotypes. Without the missing genotype filter it is equal to the mean  $H$  for the single samples (Table S1.4). With the filter it is the same as  $H$  for the SNPs called in all samples (Table S1.11, last row).

| N   | SNPs    | Genotypes | Aa       | H      |
|-----|---------|-----------|----------|--------|
| 1-8 | 7080960 | 28407371  | 16971381 | 0.5974 |
| 8   | 1136546 | 9092368   | 2645501  | 0.2910 |
