# Supplementary material for: SNP heterozygosity, relatedness and inbreeding of whole genomes from the isolated population of the Faroe Islands
Source: PubMed Central journal article supplement (PMC10666429; doi:10.1186/s12864-023-09763-x), 2023-11-23
Supplement: 12864_2023_9763_MOESM3_ESM.pdf [file 12864_2023_9763_MOESM3_ESM.pdf]

# Additional file 3 - Supplementary table and plot of the minor allele frequency distribution

Table S3.1: Filter (`bcftools filter -i`) used to filter the SNP files before further processing with PLINK.

| Autosome files | Filter-text |
|----------------|-------------|
| SNP VCFs       | QUAL>30     |

Table S3.2: The *maf*-distribution of 1136546 SNPs for the eight merged samples from the Faroe Islands made with PLINK (`plink --freq`), and summarised with counts and proportions for each minor allele frequency. With eight samples and 16 alleles at each SNP position there are nine possible minor allele frequencies:  $(0-8)/16 = 0.0000, 0.0625, 0.1250, 0.1875, 0.2500, 0.3125, 0.3750, 0.4375, 0.5000$ .

| maf    | count  | proportion |
|--------|--------|------------|
| 0.0000 | 379415 | 0.3338     |
| 0.0625 | 146428 | 0.1288     |
| 0.1250 | 145813 | 0.1283     |
| 0.1875 | 135406 | 0.1191     |
| 0.2500 | 111420 | 0.0980     |
| 0.3125 | 84796  | 0.0746     |
| 0.3750 | 53253  | 0.0469     |
| 0.4375 | 28069  | 0.0247     |
| 0.5000 | 51946  | 0.0457     |

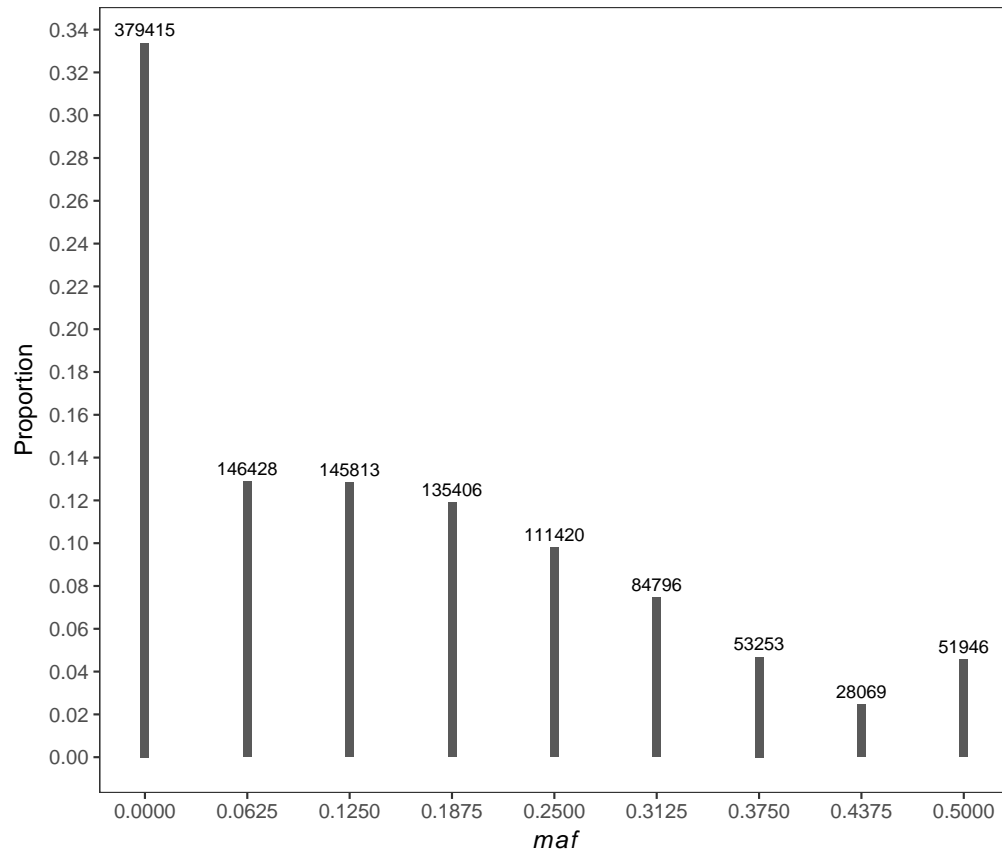

Figure S3.1: The *maf*-distribution of 1136546 SNPs for the eight merged samples from the Faroe Islands made with PLINK and summarised with counts and proportions for each minor allele frequency. The proportions are on the y-scale and the counts above the bars.
