# Supplementary material for: SNP heterozygosity, relatedness and inbreeding of whole genomes from the isolated population of the Faroe Islands
Source: PubMed Central journal article supplement (PMC10666429; doi:10.1186/s12864-023-09763-x), 2023-11-23
Supplement: 12864_2023_9763_MOESM4_ESM.pdf [file 12864_2023_9763_MOESM4_ESM.pdf]

# Additional file 4 - Supplementary ancestry analysis

Table S4.1: Filter (`bcftools filter -i`) used to filter the SNP files before further processing with KING.

| Autosome files | Filter-text |
|----------------|-------------|
| SNP VCFs       | QUAL>30     |

Table S4.2: Summary of the KING (`--mds --projection`) inferred ancestry using 700832 autosome SNPs of the eight samples from the Faroe Islands projected together with a 1000GP reference (KGref.bed, 2451 samples).

| Ancestry | values | parameter | min   | q1     | med   | mean   | q3     | max   | iqr    | sd     |
|----------|--------|-----------|-------|--------|-------|--------|--------|-------|--------|--------|
| EUR      | 8      | Pr_Anc    | 0.994 | 0.9968 | 0.997 | 0.9969 | 0.9972 | 0.999 | 0.0005 | 0.0015 |
| AMR      | 8      | Pr_2nd    | 0.001 | 0.0010 | 0.001 | 0.0018 | 0.0023 | 0.004 | 0.0013 | 0.0012 |

Table S4.3: Summary of the KING (`--mds --projection`) 20 MDS PCs for the eight samples from the Faroe Islands. The first 20 PCs are able to explain 19.3% of total variance. The proportion of total variance explained (%) by each PC is: 11.3 4.4 1.1 0.8 0.2 0.1 0.1 0.1 0.1 0.1 0.1 0.1 0.1 0.1 0.1 0.1 0.1 0.1 0.1 0.1.

| PC   | values | min     | q1      | med     | mean    | q3      | max     | iqr    | sd     |
|------|--------|---------|---------|---------|---------|---------|---------|--------|--------|
| PC1  | 8      | -0.0167 | -0.0166 | -0.0162 | -0.0162 | -0.0160 | -0.0154 | 0.0006 | 0.0005 |
| PC2  | 8      | -0.0297 | -0.0292 | -0.0290 | -0.0290 | -0.0286 | -0.0283 | 0.0005 | 0.0005 |
| PC3  | 8      | 0.0149  | 0.0151  | 0.0160  | 0.0161  | 0.0166  | 0.0187  | 0.0015 | 0.0013 |
| PC4  | 8      | 0.0163  | 0.0175  | 0.0186  | 0.0186  | 0.0192  | 0.0216  | 0.0017 | 0.0017 |
| PC5  | 8      | -0.0079 | -0.0057 | -0.0051 | -0.0046 | -0.0027 | -0.0020 | 0.0030 | 0.0021 |
| PC6  | 8      | 0.0140  | 0.0147  | 0.0171  | 0.0178  | 0.0185  | 0.0264  | 0.0038 | 0.0041 |
| PC7  | 8      | -0.0090 | -0.0069 | -0.0048 | -0.0042 | -0.0016 | 0.0015  | 0.0053 | 0.0039 |
| PC8  | 8      | -0.0105 | -0.0072 | -0.0054 | -0.0036 | -0.0020 | 0.0104  | 0.0052 | 0.0065 |
| PC9  | 8      | -0.0076 | -0.0059 | -0.0040 | -0.0033 | -0.0004 | 0.0018  | 0.0055 | 0.0036 |
| PC10 | 8      | -0.0066 | -0.0043 | -0.0025 | 0.0024  | 0.0123  | 0.0156  | 0.0166 | 0.0094 |
| PC11 | 8      | -0.0151 | -0.0036 | 0.0043  | 0.0016  | 0.0088  | 0.0100  | 0.0124 | 0.0088 |
| PC12 | 8      | -0.0071 | -0.0030 | 0.0009  | 0.0020  | 0.0085  | 0.0100  | 0.0115 | 0.0065 |
| PC13 | 8      | -0.0087 | -0.0015 | -0.0006 | 0.0008  | 0.0022  | 0.0102  | 0.0036 | 0.0062 |
| PC14 | 8      | -0.0068 | 0.0034  | 0.0068  | 0.0055  | 0.0097  | 0.0113  | 0.0064 | 0.0060 |
| PC15 | 8      | -0.0106 | -0.0053 | -0.0006 | 0.0003  | 0.0037  | 0.0189  | 0.0090 | 0.0093 |
| PC16 | 8      | -0.0116 | -0.0066 | -0.0050 | -0.0038 | 0.0012  | 0.0024  | 0.0077 | 0.0049 |
| PC17 | 8      | -0.0129 | -0.0014 | 0.0058  | 0.0030  | 0.0086  | 0.0116  | 0.0100 | 0.0081 |
| PC18 | 8      | -0.0079 | 0.0011  | 0.0046  | 0.0053  | 0.0084  | 0.0220  | 0.0073 | 0.0088 |
| PC19 | 8      | -0.0087 | 0.0004  | 0.0034  | 0.0034  | 0.0075  | 0.0125  | 0.0071 | 0.0065 |
| PC20 | 8      | -0.0220 | -0.0141 | -0.0100 | -0.0102 | -0.0088 | 0.0097  | 0.0052 | 0.0099 |

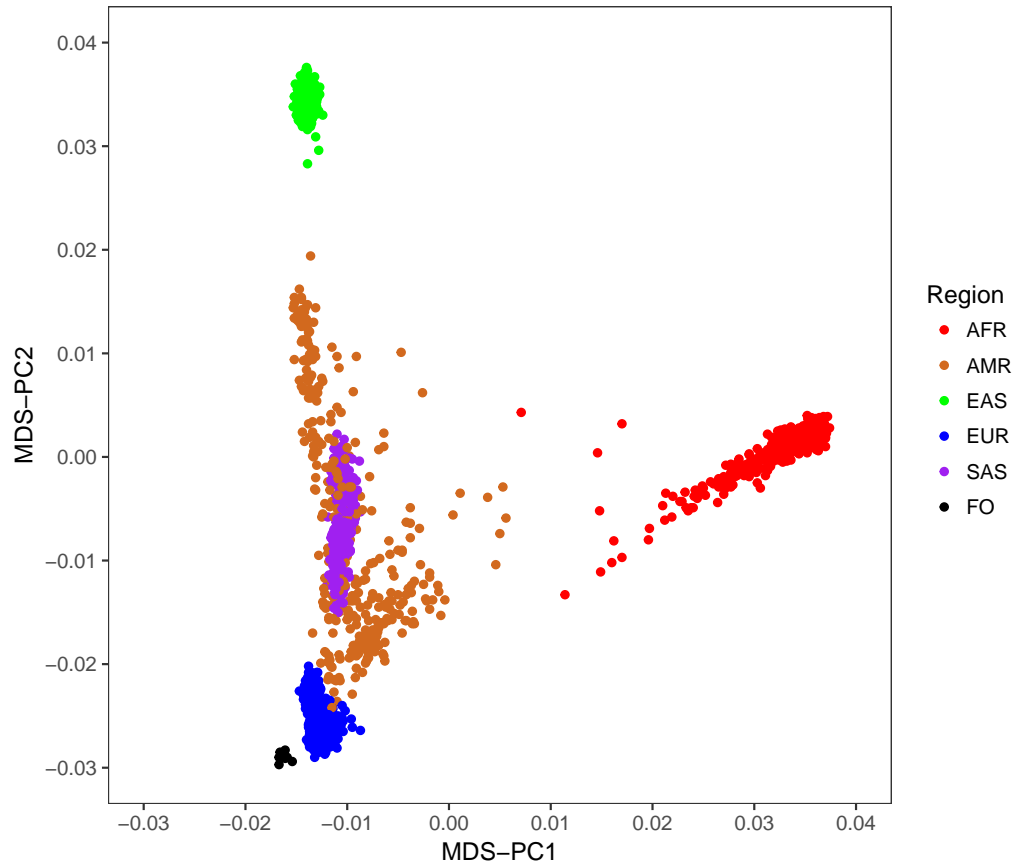

Figure S4.1: The multidimensional scaling (MDS) principal components (PC) of the samples from the Faroe Islands projected to the PC space of the 1000GP. The samples from FO (Faroe Islands, 8 samples) were projected together with a 1000GP reference (KGref.bed, 2451 samples): African (AFR, 637 samples), Admixed American (AMR, 336), East Asian (EAS, 498), European (EUR, 500) and South Asian (SAS, 480).

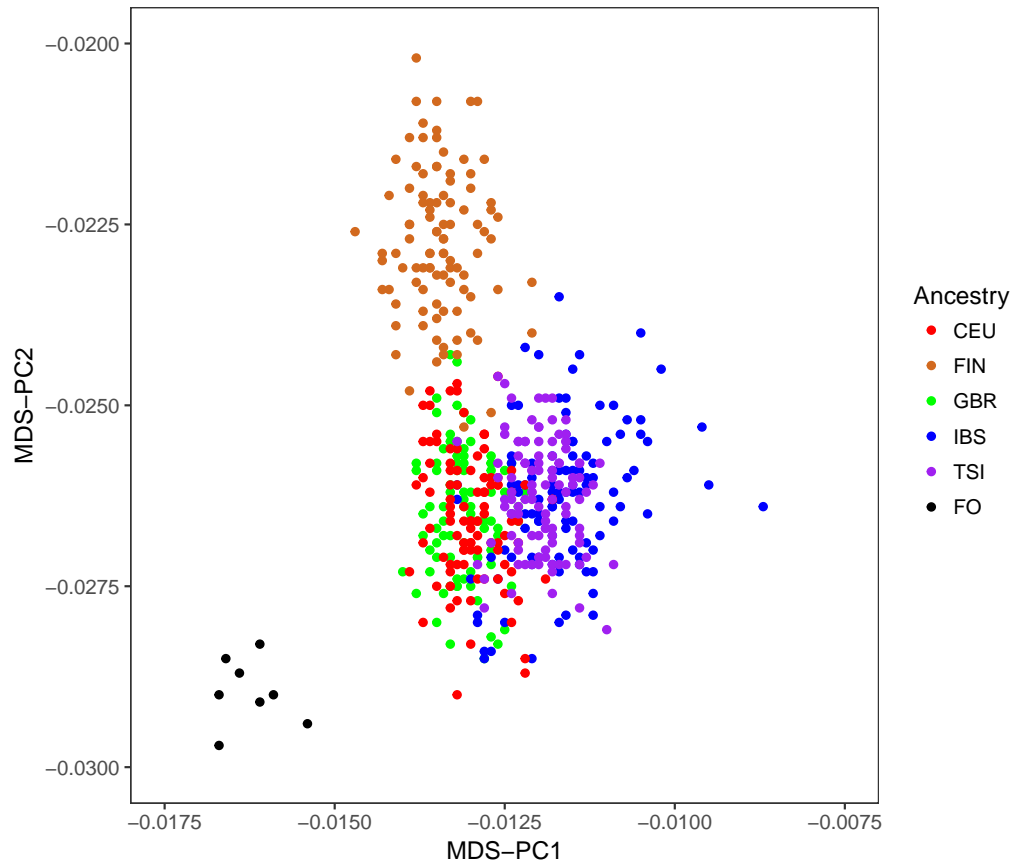

Figure S4.2: The multidimensional scaling (MDS) principal components (PC) of the samples from the Faroe Islands projected to the PC space of samples with European ancestry from the 1000GP. The FO (Faroe Islands, 8 samples) were projected together with populations of European ancestry: CEU (Utah residents with Northern and Western European ancestry, 98 samples), FIN (Finish in Finland, 99 samples), GBR (British in England and Scotland, 89 samples), IBS (Iberian population in Spain, 107 samples), TSI (Toscani in Italy, 107 samples).
